# Supplementary material
Source: Springer Nature journal article supplement (https://www.springermedizin.de/resource/supplementary/12984_2012_504_MOESM4_ESM.pdf/9604740)

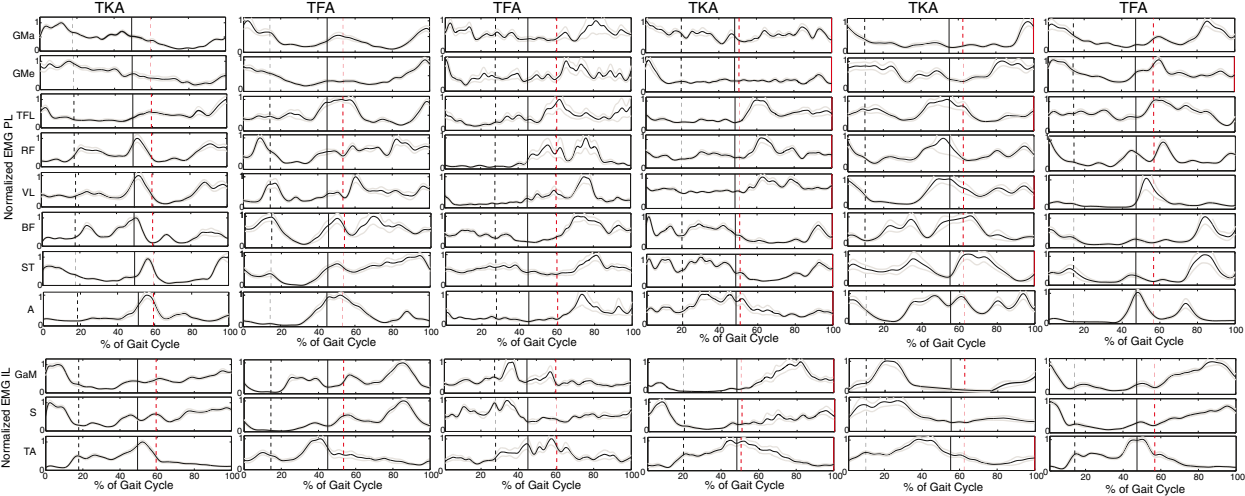

Supplement: MOESM4 [file 9604740]
